# Supplementary material
Source: MDPI journal article supplement (https://www.mdpi.com/2071-1050/14/12/7464)
Supplement: s1 [file s1]

# **Supplementary Material**

## **Spatial Suitability Evaluation of Livestock and Poultry**

### **Breeding: A Case Study in Wangkui County,**

### **Heilongjiang Province, China**

**Bao-Ling Liu <sup>1</sup>, Gang Li <sup>2,\*</sup>, Chun-Xue Yang <sup>1</sup>, Jun Ma <sup>3</sup>, Yan Zhao <sup>4</sup>, Shao-Peng Yu <sup>1</sup>,  
Jun Dong <sup>1</sup>, Hong Guo <sup>1</sup>**

<sup>1</sup> School of Geography and Tourism, Harbin University, Harbin, China

<sup>2</sup> School of Surveying and Mapping Engineering, Heilongjiang Institute of Technology, Harbin, China

<sup>3</sup> School of Environment, Harbin Institute of Technology, Harbin, China

<sup>4</sup> Harbin Institute of Technology National Engineering Research Center for Water Resources Co., Ltd. , Harbin, China.

\* Corresponding author:

Gang Li

School of Surveying and Mapping Engineering, Heilongjiang Institute of Technology

999 Hongqi Street, Daowai Dist, Harbin 150000, China

Tel. : +86-451-88028725; Fax: +86-451-57678811

E-mail: iilgcn@163.com

## Contents

**Table S1** Descriptive statistics for indexes value of evaluation units

**Table S2** The  $y_i$  means of indexes for the evaluation units included in each cluster

**Table S1** Descriptive statistics for indexes value of evaluation units

| No. | Index | Original value |         |         |       | Standardized value |         |      |
|-----|-------|----------------|---------|---------|-------|--------------------|---------|------|
|     |       | Unit           | Minimum | Maximum | Mean  | Minimum            | Maximum | Mean |
| 1   | Na1   | °              | 0       | 48.61   | 1.93  | 0                  | 3.6     | 3.29 |
| 2   | Na2   | ---            | ---     | ---     | ---   | 1.44               | 3.6     | 2.43 |
| 3   | Hu1   | ---            | ---     | ---     | ---   | 0                  | 25.28   | 5.29 |
| 4   | Hu2   | km             | 0       | 5.59    | 1.39  | 0                  | 5.06    | 1.25 |
| 5   | Ec1   | %              | 0       | 100     | 1.3   | 0                  | 19.26   | 19   |
| 6   | Ec2   | km             | 0.15    | 34.98   | 15.36 | 0                  | 6.41    | 3.66 |
| 7   | Ec3   | km             | 0       | 11.81   | 1.65  | 0                  | 6.43    | 4.33 |
| 8   | En1   | km             | 0.17    | 5.39    | 0.94  | 0                  | 11.73   | 7.48 |
| 9   | En2   | km             | 0       | 45.69   | 16.3  | 0                  | 10.56   | 6.81 |
| 10  | En3   | km             | 0.03    | 9.57    | 2.63  | 0                  | 3.36    | 0.91 |
| 11  | En4   | km             | 0       | 0.2     | 0.07  | 0                  | 3.06    | 2.94 |
| 12  | En5   | km             | 0       | 2.55    | 0.3   | 0                  | 1.63    | 1.44 |

**Table S2** The  $y_i$  means of indexes for the evaluation units included in each cluster

| Clustering code | $y_i\_Na1$ | $y_i\_Na2$ | $y_i\_Hu1$ | $y_i\_Hu2$ | $y_i\_Ec1$ | $y_i\_Ec2$ | $y_i\_Ec3$ | $y_i\_En1$ | $y_i\_En2$ | $y_i\_En3$ | $y_i\_En4$ | $y_i\_En5$ |
|-----------------|------------|------------|------------|------------|------------|------------|------------|------------|------------|------------|------------|------------|
| C01             | 92.93      | 88.72      | 19.06      | 20.34      | 55.90      | 61.52      | 74.46      | 31.87      | 71.34      | 14.72      | 96.86      | 88.96      |
| C02             | 92.79      | 100.00     | 19.48      | 26.00      | 100.00     | 73.87      | 86.30      | 90.36      | 84.28      | 20.78      | 99.66      | 87.97      |
| C03             | 98.69      | 58.50      | 19.35      | 18.32      | 99.91      | 69.65      | 7.22       | 80.42      | 80.59      | 17.85      | 99.65      | 86.99      |
| C04             | 99.18      | 40.06      | 19.83      | 23.06      | 99.98      | 65.02      | 88.92      | 78.16      | 79.35      | 18.40      | 99.88      | 75.85      |
| C05             | 96.90      | 84.80      | 20.26      | 27.26      | 100.00     | 57.11      | 71.74      | 71.19      | 75.02      | 25.46      | 99.32      | 57.06      |
| C06             | 95.17      | 100.00     | 20.18      | 21.89      | 99.87      | 68.51      | 76.99      | 0.48       | 82.73      | 22.12      | 99.42      | 91.94      |
| C07             | 90.34      | 43.91      | 20.23      | 22.62      | 99.99      | 70.96      | 77.61      | 3.13       | 73.25      | 14.55      | 99.24      | 92.30      |
| C08             | 79.42      | 40.17      | 19.58      | 23.20      | 99.99      | 69.80      | 89.82      | 85.60      | 70.65      | 21.56      | 99.78      | 89.97      |
| C09             | 98.95      | 52.31      | 19.45      | 44.38      | 99.93      | 63.00      | 81.40      | 88.23      | 80.46      | 30.40      | 99.79      | 91.00      |
| C10             | 99.96      | 40.00      | 19.75      | 16.45      | 100.00     | 62.86      | 90.73      | 85.41      | 71.23      | 30.77      | 99.92      | 88.23      |
| C11             | 98.64      | 78.42      | 21.31      | 51.76      | 99.88      | 59.43      | 70.68      | 0.00       | 81.70      | 25.77      | 98.72      | 92.26      |
| C12             | 94.54      | 73.72      | 43.33      | 30.17      | 100.00     | 65.34      | 72.26      | 55.31      | 78.80      | 25.90      | 77.29      | 98.48      |
| C13             | 79.10      | 61.64      | 19.30      | 24.17      | 100.00     | 82.38      | 0.85       | 68.79      | 55.32      | 19.80      | 99.56      | 93.21      |
| C14             | 79.55      | 67.92      | 19.47      | 19.63      | 100.00     | 65.70      | 81.91      | 88.48      | 62.03      | 46.06      | 99.76      | 89.15      |
| C15             | 91.96      | 62.56      | 19.12      | 15.29      | 100.00     | 58.37      | 73.75      | 2.15       | 68.32      | 43.30      | 99.65      | 90.40      |
| C16             | 99.87      | 78.30      | 19.85      | 19.82      | 100.00     | 58.71      | 84.50      | 84.94      | 69.48      | 47.67      | 99.89      | 84.42      |
| C17             | 97.22      | 65.49      | 20.00      | 17.16      | 100.00     | 50.71      | 1.86       | 69.94      | 63.02      | 33.84      | 99.81      | 88.42      |
| C18             | 94.37      | 68.00      | 0.13       | 23.03      | 100.00     | 53.55      | 59.29      | 57.03      | 63.53      | 28.49      | 53.35      | 85.64      |
| C19             | 64.66      | 81.59      | 23.58      | 21.43      | 100.00     | 83.56      | 75.02      | 46.63      | 48.61      | 32.03      | 95.53      | 96.48      |
| C20             | 79.89      | 53.62      | 19.42      | 18.77      | 99.71      | 44.16      | 49.15      | 84.48      | 45.59      | 17.87      | 99.65      | 91.73      |
| C21             | 99.45      | 77.34      | 19.56      | 21.19      | 99.93      | 34.29      | 76.35      | 87.50      | 48.95      | 18.72      | 99.83      | 87.31      |
| C22             | 86.39      | 66.63      | 43.89      | 27.62      | 100.00     | 41.84      | 63.96      | 53.62      | 46.22      | 29.78      | 79.45      | 97.68      |

|     |       |       |       |       |        |       |       |       |       |       |       |       |
|-----|-------|-------|-------|-------|--------|-------|-------|-------|-------|-------|-------|-------|
| C23 | 58.38 | 64.24 | 22.56 | 23.57 | 100.00 | 49.87 | 82.77 | 42.57 | 44.58 | 21.85 | 97.92 | 95.72 |
| C24 | 82.77 | 45.18 | 19.79 | 41.51 | 100.00 | 44.34 | 82.79 | 39.76 | 50.29 | 39.96 | 99.91 | 91.34 |
| C25 | 94.69 | 85.59 | 19.61 | 28.03 | 99.96  | 27.03 | 60.11 | 1.46  | 41.50 | 21.01 | 99.77 | 91.81 |
| C26 | 89.27 | 53.40 | 18.77 | 36.26 | 100.00 | 19.73 | 65.93 | 75.66 | 24.76 | 38.02 | 98.69 | 87.39 |
